# Supplementary material for: A human antibody reveals a conserved site on beta-coronavirus spike proteins and confers protection against SARS-CoV-2 infection
Source: PubMed Central journal article supplement (PMC8939767; doi:10.1126/scitranslmed.abi9215), 2022-02-08
Supplement: scitranslmed.abi9215_sm.pdf [file scitranslmed.abi9215_sm.pdf]

Supplementary Materials for

**A human antibody reveals a conserved site on beta-coronavirus spike proteins and confers protection against SARS-CoV-2 infection**

Panpan Zhou *et al.*

Corresponding authors: Thomas F. Rogers, trogers@scripps.edu; Ian A. Wilson, wilson@scripps.edu;  
Dennis R. Burton, burton@scripps.edu; Raiees Andrabi, andrabi@scripps.edu

DOI: 10.1126/scitranslmed.abi9215

**The PDF file includes:**

Figs. S1 to S11  
Tables S1 and S2  
References (93–98)

**Other Supplementary Material for this manuscript includes the following:**

MDAR Reproducibility Checklist  
Data file S1

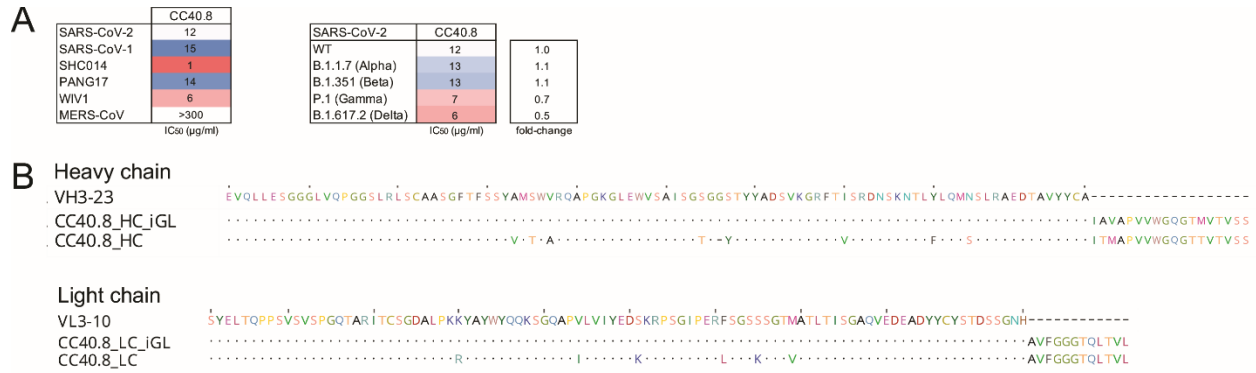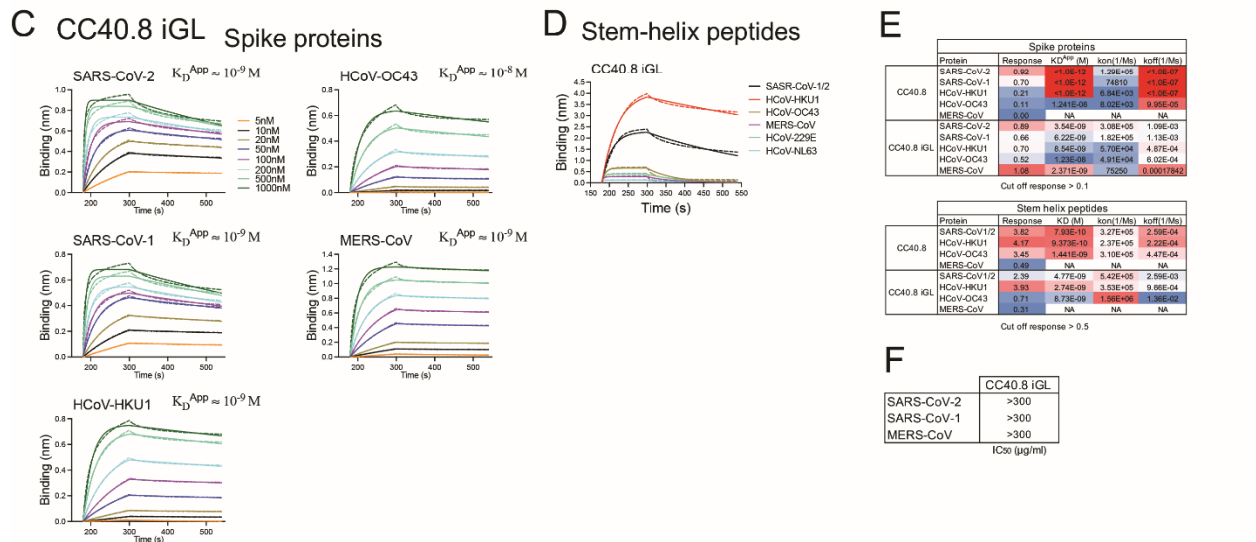

**Fig. S1. CC40.8 mature and CC40.8 iGL antibodies bind to spike proteins and stem-helix peptides and mature antibody neutralizes pseudotyped coronaviruses.**

(A) IC<sub>50</sub> neutralization of CC40.8 broadly neutralizing antibody (bnAb) is shown for sarbecoviruses (SARS-CoV-2, SARS-CoV-1, SHC014, Pang17 and WIV1), MERS-CoV and SARS-CoV-2 variants of concern (alpha (B.1.1.7), beta (B.1.351), gamma (P.1) and delta (B.1.617.2)).

(B) Sequence alignment of CC40.8 heavy and light chains with their corresponding germline V-gene sequences (VH3-23 and VL3-10) is shown with the design of CC40.8 antibody inferred germline (iGL) gene sequences. Dots represent identical residues and dashes represent gaps introduced to preserve the alignment.

(C) BioLayer Interferometry (BLI) binding is shown for CC40.8 iGL antibody with human β-HCoV soluble spike proteins. Apparent binding constants (K<sub>D</sub><sup>APP</sup>) for each antibody-antigen interaction are indicated. The raw experimental curves are shown as dashed lines, and the solid lines are the fits.

(D) BLI binding is shown for CC40.8 iGL antibody (Ab) to 25-mer stem peptides derived from all HCoV spike proteins. The kinetic curves are fit with a 1:1 binding mode.

(E) Binding kinetics (K<sub>D</sub><sup>APP</sup> (spike proteins), K<sub>D</sub> (stem-helix peptides) k<sub>on</sub> and k<sub>off</sub> constants) of CC40.8 and CC40.8 iGL antibodies with human β-HCoV soluble spike proteins and the 25-mer β-HCoV stem peptides are shown.

(F) IC<sub>50</sub> neutralization of CC40.8 iGL is shown for sarbecoviruses (SARS-CoV-2 and SARS-CoV-1) and MERS-CoV.

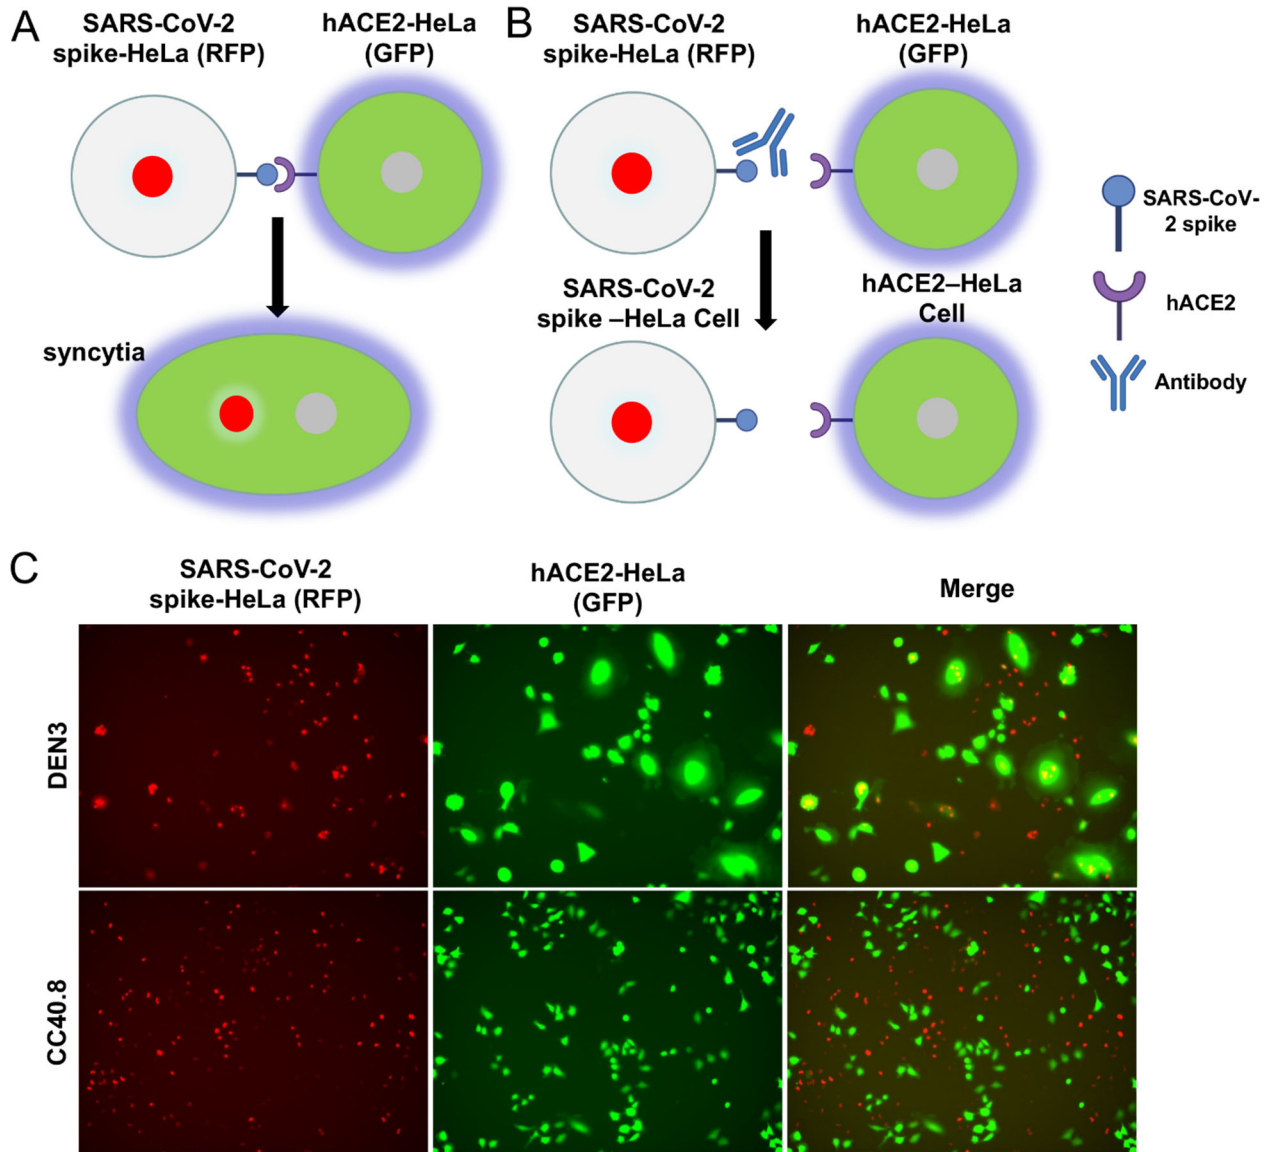

26

27

28

29

30

31

32

33

34

35

36

37

38

39

40

**Fig. S2. CC40.8 antibody inhibits SARS-CoV-2 spike protein- and hACE2-mediated cell-cell fusion.**

**(A and B)** A schematic diagram of cell-cell fusion assay is shown. SARS-CoV-2 spike-HeLa cells express nucleus-restricted RFP (Red) and hACE2-HeLa cells express cytosolic GFP (Green). The interaction of SARS-CoV-2 spike protein and hACE2 can lead to cell fusion to form syncytia. In the same syncytium, both GFP in the cytoplasm and RFP in the nucleus can be seen (A). If antibody can block cell-cell fusion, no syncytia can be seen. Only GFP-expressing hACE2-HeLa cells and RFP-expressing SARS-CoV-2 spike-HeLa cells can be seen (B).

**(C)** SARS-CoV-2 spike-HeLa cells (red) were pre-incubated with negative control antibody (DEN3) or CC40.8 S2 stem bnAb for 1 hour, and then mixed with hACE2-HeLa cells (green). Green syncytia were observed with DEN3, indicating widespread cell-cell fusion mediated by SARS-CoV-2 spike and hACE2; fusion was inhibited by addition of CC40.8.

| Peptide number | HKU1 S2 residues | Sequence         | OD405nm |      | Peptide number | HKU1 S2 residues | Sequence         | OD405nm |      | Peptide number | HKU1 S2 residues | Sequence          | OD405nm |      |
|----------------|------------------|------------------|---------|------|----------------|------------------|------------------|---------|------|----------------|------------------|-------------------|---------|------|
|                |                  |                  | CC40.8  | DEN3 |                |                  |                  | CC40.8  | DEN3 |                |                  |                   | CC40.8  | DEN3 |
| 1              | 761-775          | SISASYRFVTFEPPN  | 0.2     | 0.2  | 40             | 956-970          | ESQISGYTAAATVAA  | 0.1     | 0.2  | 79             | 1151-1165        | SYKPISFKTVLVSPG   | 0.2     | 0.2  |
| 2              | 766-780          | YRFVTFEPPNVSVFN  | 0.2     | 0.2  | 41             | 961-975          | GYTAAATVAAMFFPW  | 0.2     | 0.2  | 80             | 1156-1170        | SFKTVLVSPGLCISG   | 0.2     | 0.3  |
| 3              | 771-785          | FEPPNVSVNDSIES   | 0.1     | 0.2  | 42             | 966-980          | ATVAAMFFPWSAAG   | 0.1     | 0.2  | 81             | 1161-1175        | LVSPLGLCISGAVGLA  | 0.2     | 0.2  |
| 4              | 776-790          | VSVFNDSIESVGGGLY | 0.1     | 0.2  | 43             | 971-985          | MFPWWSAAGIPFSL   | 0.2     | 0.2  | 82             | 1166-1180        | LCISGDPVGIAPKQGY  | 0.2     | 0.2  |
| 5              | 781-795          | DSIESVGGLYEIKIP  | 0.2     | 0.2  | 44             | 976-990          | SAAAGIPFSLNVQYR  | 0.2     | 0.2  | 83             | 1171-1185        | DVGIAPKQGYFKIHN   | 0.2     | 0.2  |
| 6              | 786-800          | VGGLYEIKIPNFTPI  | 0.1     | 0.2  | 45             | 981-995          | IPFSLNVQYRINGLG  | 0.2     | 0.2  | 84             | 1176-1190        | PKQGYFKIHNHWMF    | 0.2     | 0.2  |
| 7              | 791-805          | EIKIPNFTIVGQEE   | 0.1     | 0.2  | 46             | 986-1000         | NVQYRINGLGVTMDV  | 0.2     | 0.2  | 85             | 1181-1195        | FKIHNHWMFTGSSY    | 0.2     | 0.3  |
| 8              | 796-810          | TNFTIVGQEEPIQTN  | 0.1     | 0.2  | 47             | 991-1005         | INGLGVNMDVLRNKNQ | 0.1     | 0.2  | 86             | 1186-1200        | DHWMFTGSSYYPEP    | 0.2     | 0.2  |
| 9              | 801-815          | VQGEPIQTNSPKVTV  | 0.1     | 0.2  | 48             | 996-1010         | VTMDVLRNKNKLIAT  | 0.2     | 0.2  | 87             | 1191-1205        | TGSSYYPEPISDKN    | 0.2     | 0.2  |
| 10             | 806-820          | FIQTNSPKVTIDCSL  | 0.2     | 0.2  | 49             | 1001-1015        | LKNKLIATAFNNA    | 0.2     | 0.2  | 88             | 1196-1210        | YPEPISDKNVFMN     | 0.2     | 0.2  |
| 11             | 811-825          | SPKVTIDCSLFCVCSN | 0.2     | 0.2  | 50             | 1006-1020        | KLIATAFNNAISLS   | 0.2     | 0.2  | 89             | 1201-1215        | ISDKNVFMNFCVSN    | 0.2     | 0.2  |
| 12             | 816-830          | IDCSLFCVCSNYAACH | 0.2     | 0.2  | 51             | 1011-1025        | AFNNAISLSIQNGFSA | 0.2     | 0.2  | 90             | 1206-1220        | VFMNFCVSNFTKAP    | 0.2     | 0.2  |
| 13             | 821-835          | FVCSNYAACHLLDSE  | 0.2     | 0.3  | 52             | 1016-1030        | LLSIQNGFSAATNSAL | 0.1     | 0.2  | 91             | 1211-1225        | TCSVNFKAPLYVLN    | 0.2     | 0.3  |
| 14             | 826-840          | YAACHDLLSEVYFTFC | 0.2     | 0.3  | 53             | 1021-1035        | NGFSAATNSALAIQS  | 0.2     | 0.2  | 92             | 1216-1230        | FTKAPLYVLNHSVFK   | 0.2     | 0.2  |
| 15             | 831-845          | DLLSEYFTFCNDINS  | 0.2     | 0.3  | 54             | 1026-1040        | TNSALAIQSVVNSN   | 0.2     | 0.2  | 93             | 1221-1235        | LVVLNHSVFKLSDFE   | 0.2     | 0.2  |
| 16             | 836-850          | YFTFCNDINSILDEV  | 0.2     | 0.2  | 55             | 1031-1045        | AKIQSVVNSNAQALN  | 0.2     | 0.2  | 94             | 1226-1240        | HSVFKLSDFESELHSH  | 0.2     | 0.2  |
| 17             | 841-855          | DNINSILDEVNGLLD  | 0.1     | 0.2  | 56             | 1036-1050        | VVNSNAQALNSLLQK  | 0.2     | 0.2  | 95             | 1231-1245        | LSDFESELHSHMFKK   | 2.5     | 0.2  |
| 18             | 846-860          | ILDEVNGLLDTTQLH  | 0.1     | 0.2  | 57             | 1041-1055        | AQALNSLLQQLFNKF  | 0.2     | 0.3  | 96             | 1236-1250        | SELHSHMFKKQTSIAF  | 0.2     | 0.2  |
| 19             | 851-865          | NGLLDTTQLHVAIDL  | 0.1     | 0.2  | 58             | 1046-1060        | SLQQLFNKFGAIASS  | 0.2     | 0.2  | 97             | 1241-1255        | WFKNQTSIAFNLTALN  | 0.2     | 0.2  |
| 20             | 856-870          | TTQLHVAIDLMMQVTV | 0.1     | 0.2  | 59             | 1051-1065        | LFNKFGAIASSSLQEI | 0.2     | 0.2  | 98             | 1246-1260        | TSIAFNLTALNHTLN   | 0.2     | 0.2  |
| 21             | 861-875          | VADTLMMQVTVLSSNL | 0.1     | 0.2  | 60             | 1056-1070        | GAIASSSLQELSRID  | 0.2     | 0.2  | 99             | 1251-1265        | NLTALNHTINAFPLD   | 0.2     | 0.2  |
| 22             | 866-880          | MQVTVLSSNLNNTLH  | 0.1     | 0.2  | 61             | 1061-1075        | SLQELSRIDALEAQ   | 0.2     | 0.3  | 100            | 1256-1270        | LHTINATFLDLIYEM   | 0.2     | 0.2  |
| 23             | 871-885          | LSSNLNNTLHFDVDN  | 0.1     | 0.2  | 62             | 1066-1080        | LSRLDALEAQVQIDR  | 0.2     | 0.2  | 101            | 1261-1275        | ATFLDLIYEMNLIQE   | 0.2     | 0.2  |
| 24             | 876-890          | NTNLHFDVDNINPKS  | 0.1     | 0.2  | 63             | 1071-1085        | ALEAQVQIDRLINGR  | 0.2     | 0.2  | 102            | 1266-1280        | LIYEMNLIQESIKRL   | 0.2     | 0.2  |
| 25             | 881-895          | FDVDNINPKSLVQGL  | 0.2     | 0.3  | 64             | 1076-1090        | VQIDRLINGRLTALN  | 0.2     | 0.2  | 103            | 1271-1285        | NLIQESIKRSLNNSYI  | 0.2     | 0.2  |
| 26             | 886-900          | INPKSLVQGLGPHCG  | 0.2     | 0.3  | 65             | 1081-1095        | LINGRLTALNAVSVQ  | 0.2     | 0.2  | 104            | 1276-1290        | SIKSLNNSYINLKI    | 0.2     | 0.2  |
| 27             | 891-905          | LVQGLGPHCGSSRS   | 0.2     | 0.2  | 66             | 1086-1100        | LTALNAVSVQQLSDI  | 0.2     | 0.3  | 105            | 1281-1295        | NNSYINLKDITGYEM   | 0.2     | 0.2  |
| 28             | 896-910          | GPHCGSSRSFFEDL   | 0.2     | 0.2  | 67             | 1091-1105        | AVVQQLSDISLVKVF  | 0.2     | 0.3  | 106            | 1286-1300        | NLKDITGYEMVYKVP   | 0.2     | 0.2  |
| 29             | 901-915          | SSRSFFEDLDFPKV   | 0.2     | 0.2  | 68             | 1096-1110        | QLSDISLVKFGAALA  | 0.2     | 0.2  | 107            | 1291-1305        | GTYEMVYKVPVWVL    | 0.3     | 0.3  |
| 30             | 906-920          | FFEDLDFKVKLSVDV  | 0.1     | 0.2  | 69             | 1101-1115        | SLVKFGAALAMEKVN  | 0.2     | 0.2  | 108            | 1296-1310        | YVWVYKVPVWLLISFS  | 0.3     | 0.2  |
| 31             | 911-925          | LFDFKVKLSVDFGVEA | 0.2     | 0.2  | 70             | 1106-1120        | GAALAMEKVNCEVKS  | 0.2     | 0.2  | 109            | 1301-1315        | VYVWVYKVPVWLLISFS | 0.2     | 0.2  |
| 32             | 916-930          | KLSVDFGVEAYNNCT  | 0.2     | 0.3  | 71             | 1111-1125        | MEKVNCEVKSQSPRI  | 0.2     | 0.3  | 110            | 1306-1320        | LISFSPIIFLVLLFF   | 0.1     | 0.2  |
| 33             | 921-935          | GFVEAYNNCTGGSEI  | 0.2     | 0.2  | 72             | 1116-1130        | ECVKSQSPRINFCGN  | 0.2     | 0.2  | 111            | 1311-1325        | PIIFLVLLFFPICCT   | 0.2     | 0.2  |
| 34             | 926-940          | YNNCTGGSEIRDLCLL | 0.2     | 0.2  | 73             | 1121-1135        | QSPRINFCGNHNL    | 0.2     | 0.2  | 112            | 1316-1330        | VLLFFPICCTGGCGSA  | 0.2     | 0.3  |
| 35             | 931-945          | GGSEIRDLCLVQSFN  | 0.2     | 0.2  | 74             | 1126-1140        | NFCGNHNLISLVQN   | 0.2     | 0.2  | 113            | 1321-1335        | ICCTGGCGSACFSKC   | 0.2     | 0.3  |
| 36             | 936-950          | RDLCLVQSFNGIKVVL | 0.2     | 0.2  | 75             | 1131-1145        | GNHNLISLVQNPYGL  | 0.2     | 0.2  | 114            | 1326-1340        | CGGSACFSKCHNCDD   | 0.2     | 0.3  |
| 37             | 941-955          | VQSFNGIKVLPPILS  | 0.2     | 0.2  | 76             | 1136-1150        | SLVQNYPYGLLFMHF  | 0.2     | 0.3  | 115            | 1331-1345        | CFSKCHNCDEYGGH    | 0.2     | 0.2  |
| 38             | 946-960          | GKVLPIILSESQIS   | 0.2     | 0.2  | 77             | 1141-1155        | APYGLLFMHFYSKPI  | 0.2     | 0.3  | 116            | 1336-1350        | HNCDEYGGHHDFVI    | 0.2     | 0.3  |
| 39             | 951-965          | PIILSESQISGYTAA  | 0.2     | 0.2  | 78             | 1146-1160        | LFMHFYSKPISEKTV  | 0.2     | 0.2  | 117            | 1341-1355        | EYGGHHDFVIKTSHD   | 0.2     | 0.2  |

41 **Fig. S3. Epitope mapping of CC40.8 antibody with HCoV-HKU1 S2 subunit-derived**  
42 **overlapping peptides.**

43 ELISA binding results are shown for CC40.8 mAb with HCoV-HKU1 S2 subunit  
44 overlapping peptides (residue number range: 761-1355). Each HCoV-HKU1 S2 subunit  
45 peptide is 15-residues long with a 10-residue overlap. Peptide IDs, S2 subunit residue  
46 number ranges of 15-mer peptides, and antibody binding responses are shown. CC40.8  
47 exhibited binding to the 95<sup>th</sup> peptide (residue position range: 1231-1245) corresponding  
48 to the HCoV-HKU1 S2 stem-helix region. DEN3, an antibody to dengue virus, was used  
49 as a control.  
50  
51

### HEP2-ANA assay (Green fluorescence)

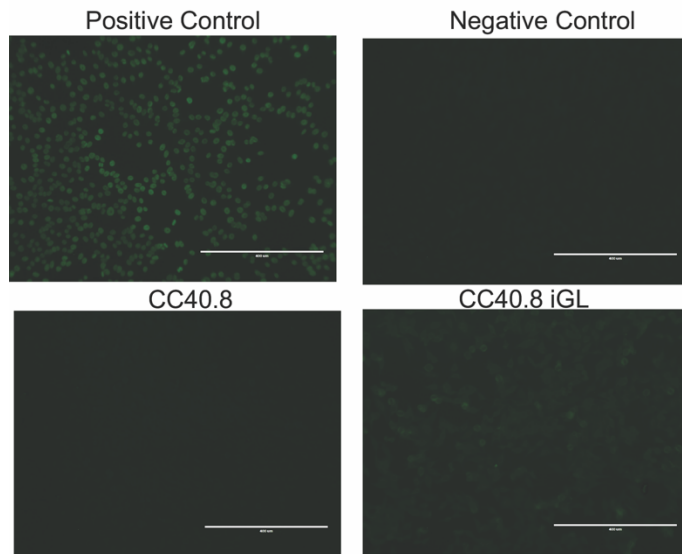

### Polyspecificity reagent (PSR) ELISA

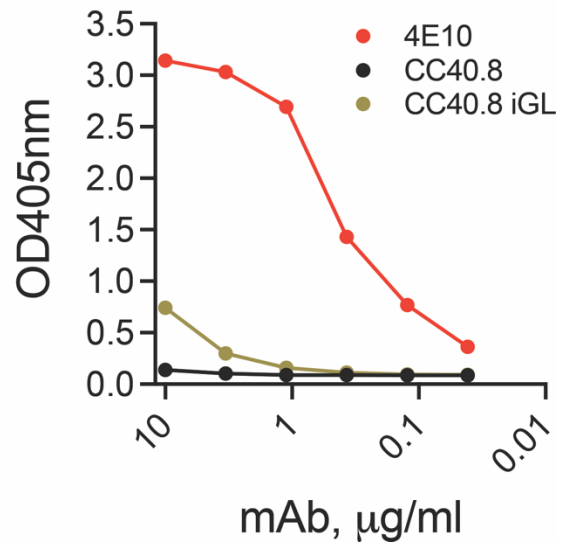

52  
53  
54  
55  
56  
57  
58  
59  
60

**Fig. S4. Polyreactivity analysis of CC40.8 and CC40.8 iGL antibodies.**

(Left) Immunofluorescence showing binding of antibodies to immobilized HEP2 epithelial cells was detected by FITC-labelled secondary antibody. Positive and negative controls for the Hep2 kit assay are provided by the manufacturer. (Right) Antibodies were tested by enzyme-linked immunosorbent assay (ELISA) for binding to the polyspecificity reagent (PSR) from CHO-cell solubilized membrane protein (SMP). 4E10, an HIV MPER-specific antibody known to display polyreactivity, was used as a positive control.

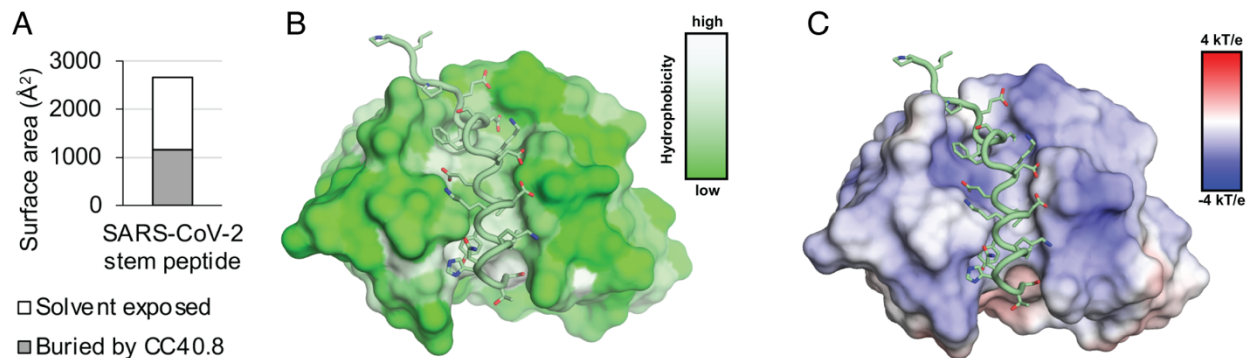

61  
62 **Fig. S5. CC40.8 bnAb structure with SARS-CoV-2 S2 stem-helix peptide.**  
63 **(A)** Surface area of the SARS-CoV-2 stem peptide is shown. Solvent exposed and buried  
64 areas were calculated with Proteins, Interfaces, Structures and Assemblies (PISA) (91).  
65 **(B)** The SARS-CoV-2 stem peptide inserts into a hydrophobic groove formed by the  
66 heavy and light chains of CC40.8. Surfaces of CC40.8 are color-coded by hydrophobicity  
67 [calculated by Color h ([https://pymolwiki.org/index.php/Color\\_h](https://pymolwiki.org/index.php/Color_h))].  
68 **(C)** Electrostatic surface potential of the CC40.8 paratope is shown. Electrostatic potential  
69 was calculated by APBS and PDB2PQR (93, 94).  
70  
71

A

## CC40.8 bnAb SHM

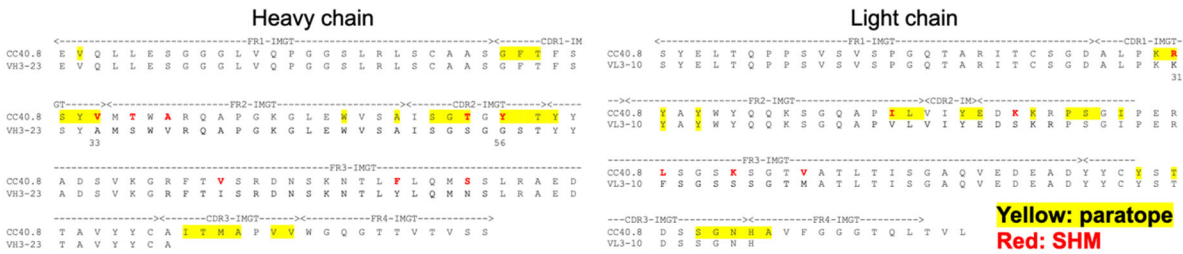

B \*Residues conserved in SARS-CoV-2, SARS-CoV, HKU1, and OC43; Green: peptide; Orange: HC; Yellow: LC

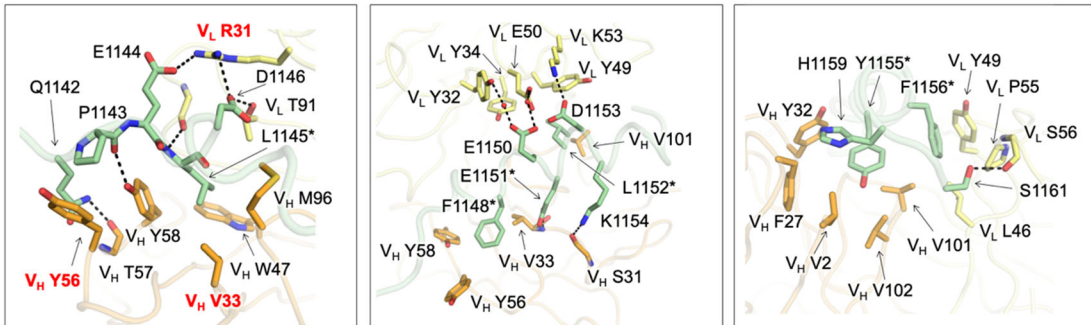

**Fig. S6. Contribution of CC40.8 bnAb heavy and light chain germline and somatic mutated V-gene residues in S2 stem epitope recognition.**

(A) Alignment of CC40.8 with germline VH3-23 and VL3-10 sequences is shown. Paratope residues [defined as buried surface area (BSA) > 0 Å<sup>2</sup> as calculated by PISA (91)] are highlighted with yellow boxes. Somatic mutated residues as calculated by IgBLAST (95) are highlighted in red.

(B) Detailed interactions between CC40.8 Fab and the SARS-CoV-2 stem peptide are shown. Heavy and light chains of CC40.8 are shown in orange and yellow, and the SARS-CoV-2 stem peptide is in pale green. Hydrogen bonds and salt bridges are represented by black dashed lines. Somatic mutated residues are shown in red. Conserved residues among coronaviruses are indicated by asterisks (\*).

|                |                         | Alanine scanning of SARS-CoV-2 Spike |        |        |        |        |        |        |        |        |        |        |        |        |  |
|----------------|-------------------------|--------------------------------------|--------|--------|--------|--------|--------|--------|--------|--------|--------|--------|--------|--------|--|
| SARS-CoV-2     |                         | WT                                   | P1140A | L1141A | Q1142A | P1143A | E1144A | L1145A | D1146A | S1147A | F1148A | K1149A | E1150A | E1151  |  |
| Neutralization | IC50 (ug/ml, CC40.8)    | 11.5                                 | 1.4    | 0.6    | 3.3    | 238.4  | 14.6   | N/A    | 84.0   | 20.5   | >300   | 0.6    | 24.2   | >300   |  |
|                | n-fold                  | 1.0                                  | 0.1    | 0.1    | 0.3    | 20.7   | 1.3    | N/A    | 7.3    | 1.8    | >26.11 | 0.0    | 2.1    | >26.11 |  |
| BLI Binding    | Response Value (CC40.8) | 0.61                                 | 0.57   | N/A    | 0.59   | 0.21   | 0.62   | 0.02   | 0.52   | 0.55   | 0.35   | 0.61   | 0.51   | 0.07   |  |
|                | % change with WT        | 100%                                 | 95%    | N/A    | 97%    | 35%    | 102%   | 4%     | 86%    | 90%    | 58%    | 101%   | 83%    | 12%    |  |
|                | Response Value (S309)   | 0.43                                 | 0.43   | N/A    | 0.41   | 0.45   | 0.42   | 0.40   | 0.43   | 0.45   | 0.44   | 0.42   | 0.48   | 0.47   |  |
|                | % change with WT        | 100%                                 | 100%   | N/A    | 94%    | 103%   | 97%    | 91%    | 100%   | 103%   | 101%   | 98%    | 110%   | 108%   |  |

  

|              |                         | Alanine scanning of SARS-CoV-2/1/2 S2 stem peptide |        |        |        |        |        |        |        |        |        |        |        |       |  |
|--------------|-------------------------|----------------------------------------------------|--------|--------|--------|--------|--------|--------|--------|--------|--------|--------|--------|-------|--|
| SARS-CoV-1/2 |                         | WT                                                 | P1140A | L1141A | Q1142A | P1143A | E1144A | L1145A | D1146A | S1147A | F1148A | K1149A | E1150A | E1151 |  |
| BLI Binding  | Response Value (CC40.8) | 3.8                                                | 3.5    | 3.8    | 3.8    | 3.7    | 3.5    | 0.9    | 3.3    | 3.3    | 2.3    | 3.7    | 3.5    | 0.6   |  |
|              | % change with WT        | 100%                                               | 92%    | 99%    | 99%    | 97%    | 92%    | 22%    | 86%    | 87%    | 61%    | 96%    | 91%    | 16%   |  |

  

|             |                         | Alanine scanning of HCoV-HKU1 S2 stem peptide |        |        |        |        |        |        |        |        |        |        |        |        |  |
|-------------|-------------------------|-----------------------------------------------|--------|--------|--------|--------|--------|--------|--------|--------|--------|--------|--------|--------|--|
| HCoV-HKU1   |                         | WT                                            | H1140A | S1141A | V1142A | P1143A | K1144A | L1145A | S1146A | D1147A | F1148A | E1149A | S1150A | E1151A |  |
| BLI Binding | Response Value (CC40.8) | 4.2                                           | 4.6    | 4.3    | 4.4    | 4.4    | 4.4    | 3.3    | 4.4    | 4.0    | 4.0    | 3.6    | 4.0    | 1.7    |  |
|             | % change with WT        | 100%                                          | 110%   | 104%   | 105%   | 106%   | 105%   | 79%    | 105%   | 96%    | 96%    | 87%    | 96%    | 41%    |  |

  

|             |                         | Alanine scanning of HCoV-HKU1 S2 stem peptide |        |        |        |        |        |        |        |        |        |        |        |        |  |
|-------------|-------------------------|-----------------------------------------------|--------|--------|--------|--------|--------|--------|--------|--------|--------|--------|--------|--------|--|
| HCoV-HKU1   |                         | L1152A                                        | S1153A | H1154A | W1155A | K1156A | F1157A | N1158A | Q1159A | T1160A | S1161A | P1162A | D1163A | V1164A |  |
| BLI Binding | Response Value (CC40.8) | 3.7                                           | 4.0    | 3.8    | 1.8    | 2.7    | 4.5    | 4.2    | 4.2    | 4.3    | 4.3    | 4.2    | 4.2    | 3.8    |  |
|             | % change with WT        | 88%                                           | 96%    | 91%    | 43%    | 64%    | 107%   | 101%   | 100%   | 104%   | 104%   | 104%   | 100%   | 91%    |  |

Neutralization  
n-fold <0.3  
n-fold >5

BLI Binding  
% change <80%

84  
85 **Fig. S7. Epitope mapping of CC40.8 bnAb by alanine scanning mutagenesis of**  
86 **SARS-CoV-2 spike protein and SARS-CoV-2/HCoV-HKU1 S2 stem peptides using**  
87 **neutralization and BLI binding assays.**  
88 The upper panel shows the IC<sub>50</sub> neutralization of CC40.8 bnAb with wild-type (WT) SARS-  
89 CoV-2 and spike mutant pseudoviruses and the BLI binding responses with WT SARS-  
90 CoV-2 soluble spike protein and alanine mutants. SARS-CoV-2 receptor binding domain  
91 (RBD) antibody S309 was a control for the spike protein binding assays. The IC<sub>50</sub> fold  
92 change (n-fold) was calculated by dividing the mutant value by the WT value. For IC<sub>50</sub>, n-  
93 fold <0.3 are indicated in red, and n-fold >5 in orange. The middle and lower panels show  
94 BLI binding responses of CC40.8 antibody to WT and alanine mutants of the SARS-CoV-  
95 1/2 and HCoV-HKU1 stem-helix peptides, respectively. Binding response values where  
96 the % change in binding (from WT peptide) is below 80% are indicated in yellow. Antibody  
97 S309 that recognizes a fairly conserved epitope of the RBD of both SARS-CoV-1 and  
98 SARS-CoV-2 was used as control. N/A, not available.  
99



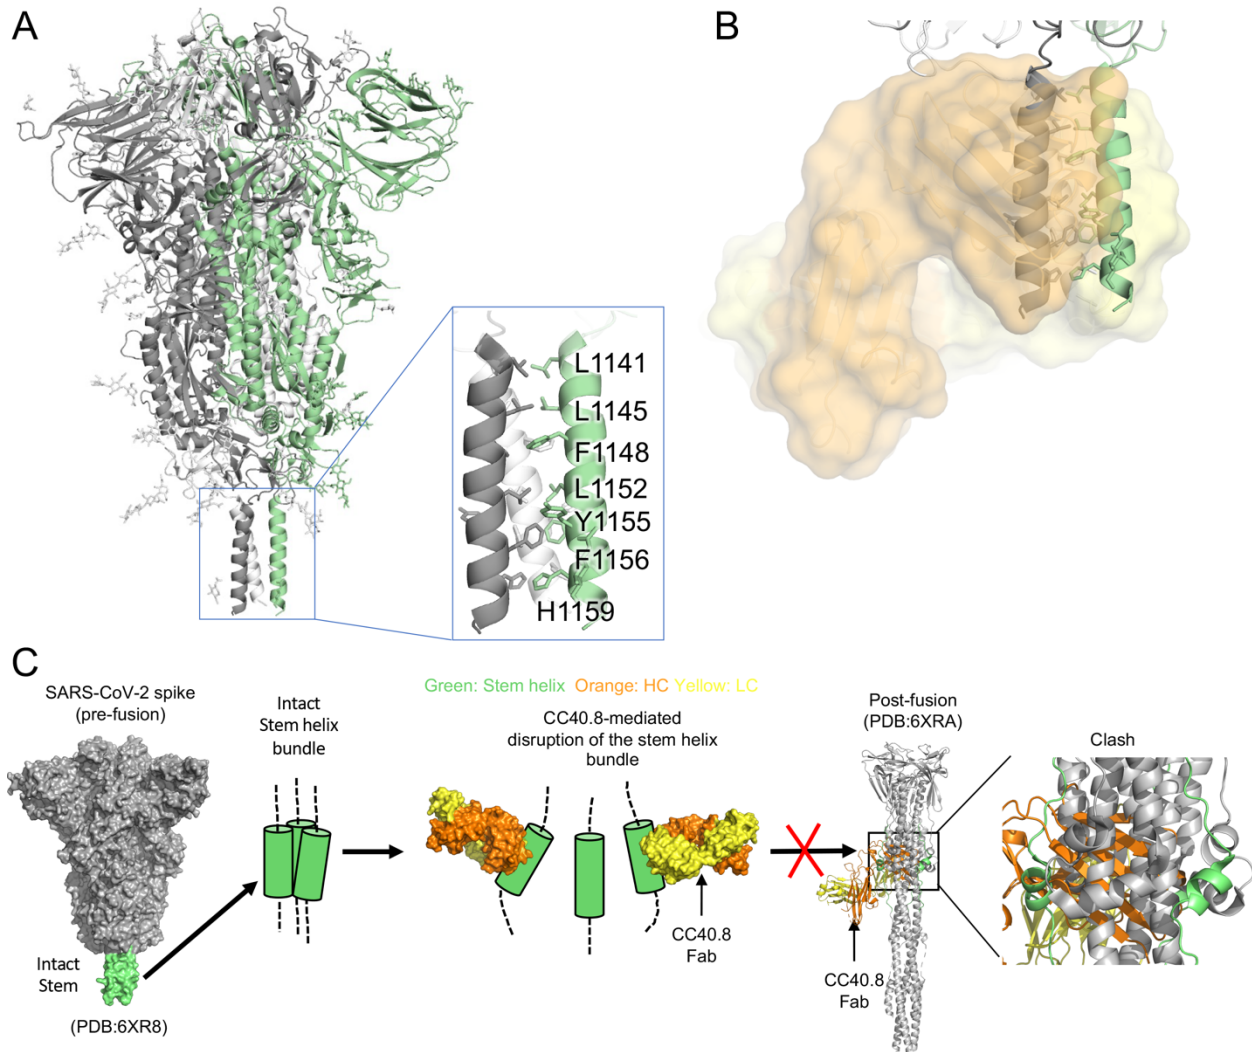

**Fig. S8. CC40.8 binds to a buried interface of the 3-helix bundle: predicted mechanism of neutralization.**

(A) A SARS-CoV-2 spike protein structure is shown in the pre-fusion state. The three protomers are shown in gray, pale green, and white, respectively, with N-linked glycans represented by sticks. The 3-helix bundle stem region is highlighted in a blue-outlined box. Representative epitope residues of CC40.8 are shown in sticks. The CC40.8 epitope is rich in hydrophobic residues. A cryo-EM structure of SARS-CoV-2 spike protein structure in the pre-fusion state that incorporates the coordinates of the 3-helix bundle stem region (PDB: 6XR8, (96)) is shown here.

(B) The SARS-CoV-2 spike protein pre-fusion structure was superimposed on the structure of CC40.8 (orange/yellow) in complex with a SARS-CoV-2 S2 peptide. CC40.8 would clash with the other protomers of the spike protein in the pre-fusion state.

(C) A putative neutralization mechanism of CC40.8 is presented. The S2 3-helix bundle region is shown in green, and heavy and light chains of CC40.8 are shown in orange and yellow, respectively. A model for the mechanism of neutralization is shown and inspired by the interaction of a mouse S2 stem antibody, B6, isolated from a spike protein vaccinated animal that targets a similar stem epitope (52).

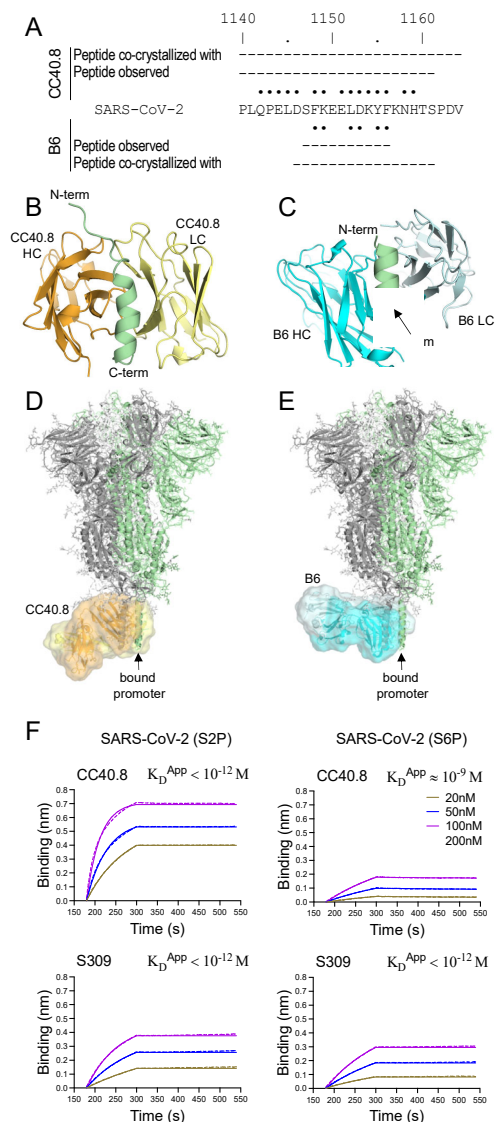

119  
 120 **Fig. S9. Comparison of bnAbs CC40.8 and B6 that target the S2 stem helix.**  
 121 (A) A comparison between S2 stem-helix peptides targeted by CC40.8 and B6 is shown.  
 122 Peptides used for co-crystallization with CC40.8 or B6 are indicated by dashes, with the  
 123 regions observed in the crystal structures of each study indicated. Residues involved in  
 124 interactions with CC40.8 and B6 are indicated by black dots (cutoff distance = 4 Å).  
 125 (B to E) Structures of CC40.8 (B) and B6 (C) were compared. The heavy and light chains  
 126 of CC40.8 are colored in orange and yellow, respectively, and those for B6 are in cyan  
 127 and light cyan. The S2 stem-helix peptides are shown in green. In panels (D) and (E), a  
 128 SARS-CoV-2 spike protein pre-fusion structure (PDB 6XR8) is superimposed on  
 129 structures of CC40.8 and B6 in complex with a SARS-CoV-2 S2 peptide in the green  
 130 protomer (indicated by arrows). Both CC40.8 and B6 would clash with the other protomers  
 131 of the spike protein in pre-fusion state.  
 132 (F) BLI binding kinetics of CC40.8 to S2- and S6- stabilized SARS-CoV-2 spike trimers  
 133 are shown. An RBD-targeting neutralizing Ab S309 (97) was used as a control. Apparent  
 134 binding constants ( $K_D^{App}$ ) of antibodies with spike proteins are shown. The raw  
 135 experimental curves are shown as dashed lines, and the solid lines are the fits.

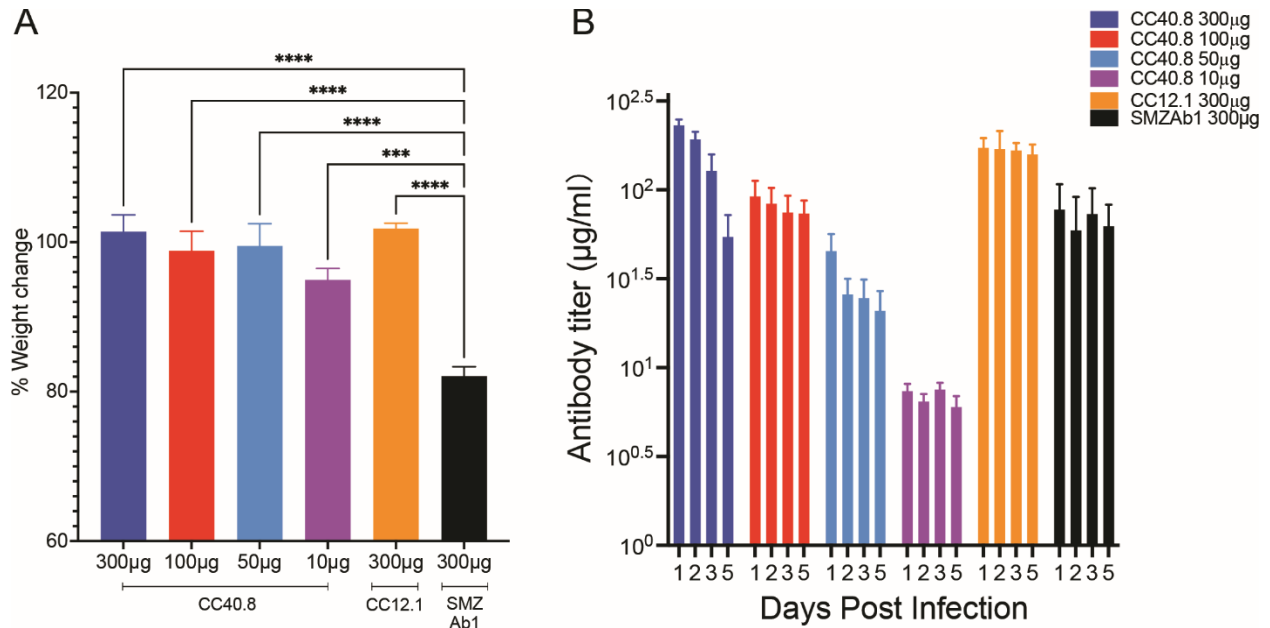

136  
137  
138  
139  
140  
141  
142  
143  
144

**Fig. S10. Weight loss, viral titers, and serum antibody titers were measured in hACE2 mice passively administered CC40.8.**

**(A)** Percent day 5 weight change was calculated from day 0 for all animals. Data are presented as mean ± SEM. Significance was calculated with Dunnett's multiple comparisons test between each experimental group and the Zika virus monoclonal Ab (SMZAb1) control group (\*\*P<0.001, \*\*\*\*P<0.0001).

**(B)** Serum human IgG concentrations of CC40.8, CC12.1 and SMZAb1 were assessed by ELISA at day 1, 2, 3, and 5 post infection. Data are presented as mean ± SEM.

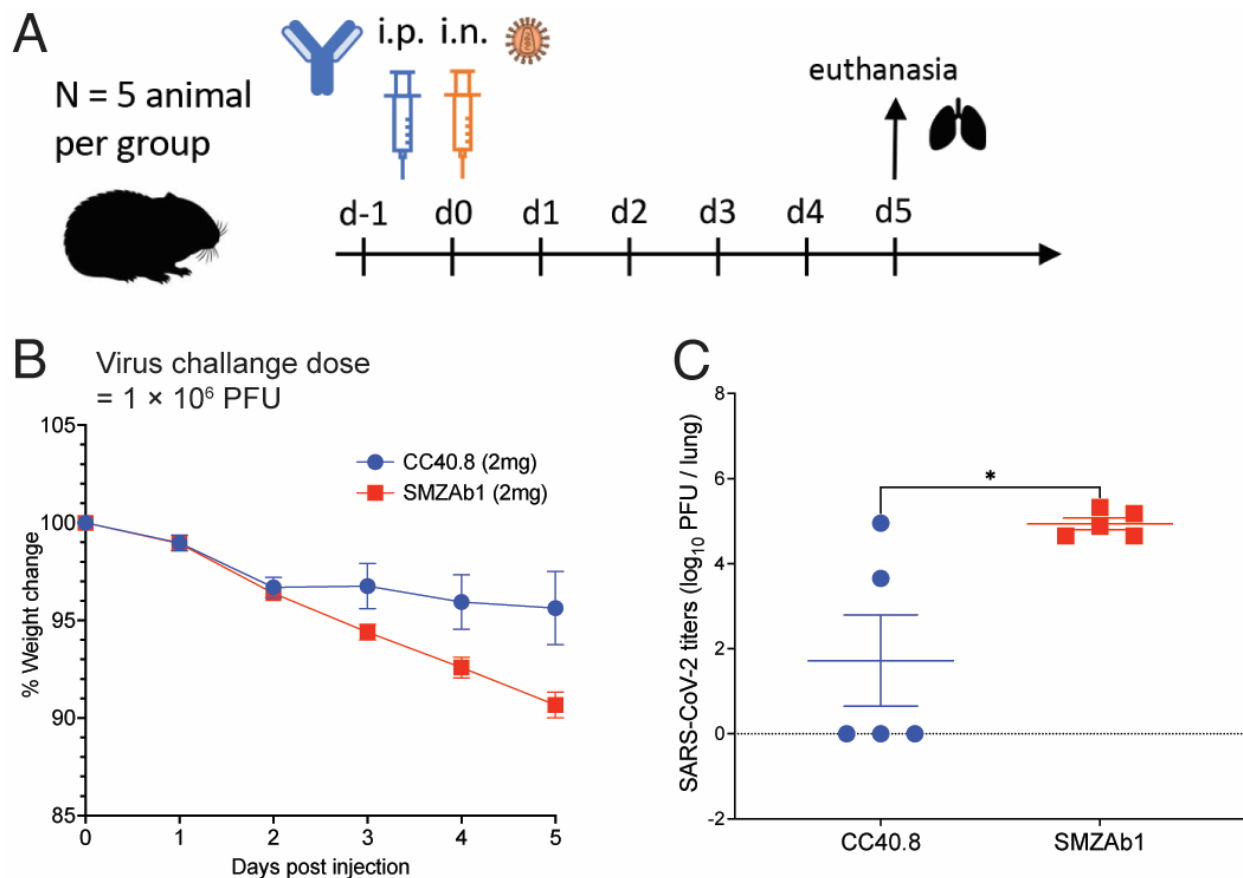

145  
146 **Fig. S11. CC40.8 reduces weight loss and lung viral load and viral replication**  
147 **following SARS-CoV-2 challenge in Syrian hamsters.**

148 (A) CC40.8 was administered intraperitoneally (i.p.) at a 2 mg per animal dose into Syrian  
149 hamsters (average: 16.5 mg/kg). Control animals received 2 mg of control SMZAb1. Each  
150 group of five animals was challenged intranasally (i.n.) 12 hours after antibody infusion  
151 with  $1 \times 10^6$  plaque-forming units (PFU) of SARS-CoV-2. Animal weight was monitored  
152 daily as an indicator of disease progression and lung tissue was collected on day 5 for  
153 viral burden assessment.

154 (B) Percent weight change is shown for CC40.8 or control antibody-treated animals after  
155 SARS-CoV-2 challenge. Percent weight change was calculated from day 0 for all animals.  
156 Data are presented as mean  $\pm$  SEM.

157 (C) SARS-CoV-2 titers (PFU) were determined by plaque assay from lung tissue at day  
158 5 after infection. Three out of 5 CC40.8-treated animals had substantially reduced viral  
159 titers compared to the SMZAb1 control antibody-treated animals. Data are presented as  
160 mean  $\pm$  SEM.  
161

162 **Table S1. X-ray data collection and refinement statistics.**

|                                                                      |                                    |
|----------------------------------------------------------------------|------------------------------------|
| <b>Data collection</b>                                               | CC40.8 Fab + SARS-CoV-2 S2 peptide |
| Beamline                                                             | SSRL12-1                           |
| Wavelength (Å)                                                       | 0.97946 Å                          |
| Space group                                                          | P 2 2 <sub>1</sub> 2 <sub>1</sub>  |
| Unit cell parameters                                                 |                                    |
| a, b, c (Å)                                                          | 54.9, 63.7, 122.0                  |
| α, β, γ (°)                                                          | 90, 90, 90                         |
| Resolution (Å) <sup>a</sup>                                          | 50.0-1.62 (1.65-1.62)              |
| Unique reflections <sup>a</sup>                                      | 54,176 (4,897)                     |
| Redundancy <sup>a</sup>                                              | 4.3 (3.0)                          |
| Completeness (%) <sup>a</sup>                                        | 97.0 (89.6)                        |
| <I/σI> <sup>a</sup>                                                  | 29.9 (1.0)                         |
| R <sub>sym</sub> <sup>b</sup> (%) <sup>a</sup>                       | 7.9 (>100)                         |
| R <sub>pim</sub> <sup>b</sup> (%) <sup>a</sup>                       | 2.8 (47.7)                         |
| CC <sub>1/2</sub> <sup>c</sup> (%) <sup>a</sup>                      | 99.4 (56.3)                        |
| <b>Refinement statistics</b>                                         |                                    |
| Resolution (Å)                                                       | 29.1-1.62                          |
| Reflections (work)                                                   | 54,129                             |
| Reflections (test)                                                   | 1,997                              |
| R <sub>cryst</sub> <sup>d</sup> / R <sub>free</sub> <sup>e</sup> (%) | 17.4/20.6                          |
| No. of atoms                                                         | 3,836                              |
| Fab                                                                  | 3,159                              |
| Peptide                                                              | 193                                |
| Ligands                                                              | 35                                 |
| Solvent                                                              | 459                                |
| Average B-values (Å <sup>2</sup> )                                   | 28                                 |
| Fab                                                                  | 26                                 |
| Peptide                                                              | 34                                 |
| Ligands                                                              | 56                                 |
| Solvent                                                              | 39                                 |
| Wilson B-value (Å <sup>2</sup> )                                     | 23                                 |
| <b>RMSD from ideal geometry</b>                                      |                                    |
| Bond length (Å)                                                      | 0.006                              |
| Bond angle (°)                                                       | 1.22                               |
| <b>Ramachandran statistics (%)<sup>g</sup></b>                       |                                    |
| Favored                                                              | 98.2                               |
| Outliers                                                             | 0.0                                |
| <b>PDB code</b>                                                      | 7SJS                               |

<sup>a</sup> Numbers in parentheses refer to the highest resolution shell.

<sup>b</sup>  $R_{sym} = \sum_{hkl} \sum_i |I_{hkl,i} - \langle I_{hkl} \rangle| / \sum_{hkl} \sum_i I_{hkl,i}$  and  $R_{pim} = \sum_{hkl} (1/(n-1))^{1/2} \sum_i |I_{hkl,i} - \langle I_{hkl} \rangle| / \sum_{hkl} \sum_i I_{hkl,i}$ , where  $I_{hkl,i}$  is the scaled intensity of the  $i^{\text{th}}$  measurement of reflection h, k, l,  $\langle I_{hkl} \rangle$  is the average intensity for that reflection, and  $n$  is the redundancy.

<sup>c</sup> CC<sub>1/2</sub> = Pearson correlation coefficient between two random half datasets.

<sup>d</sup>  $R_{cryst} = \sum_{hkl} |F_o - F_c| / \sum_{hkl} |F_o| \times 100$ , where  $F_o$  and  $F_c$  are the observed and calculated structure factors, respectively.

<sup>e</sup>  $R_{free}$  was calculated as for  $R_{cryst}$ , but on a test set comprising 5% of the data excluded from refinement.

<sup>g</sup> From MolProbity (98).

163  
164  
165  
166  
167  
168  
169  
170

171 **Table S2. Demographic information of COVID-19 convalescent donors.**

|                                          | <b>COVID donor<br/>(n = 60)</b> |
|------------------------------------------|---------------------------------|
| <b>Age (years)</b>                       | 20 to 72 (median = 46)          |
| <b>Gender</b>                            |                                 |
| Male                                     | 47% (28/60)                     |
| Female                                   | 53% (32/60)                     |
| <b>Race/Ethnicity</b>                    |                                 |
| White, non-Hispanic                      | 80% (48/60)                     |
| Hispanic                                 | 8.3% (5/60)                     |
| Black, non-Hispanic                      | 1.7% (1/60)                     |
| Asian, non-Hispanic                      | 3.3% (2/60)                     |
| Unknown                                  | 6.7% (4/60)                     |
| SARS-CoV-2 PCR Positivity                | 75% (45/60)                     |
| Lateral Flow Positivity                  | 60% (36/60)                     |
| <b>Disease Severity</b>                  |                                 |
| Mild                                     | 56.7% (34/60)                   |
| Mild to Moderate                         | 6.7% (4/60)                     |
| Moderate                                 | 25% (15/60)                     |
| Moderate to Severe                       | 5% (3/60)                       |
| Severe                                   | 5% (3/60)                       |
| Critical                                 | 1.7% (1/60)                     |
| <b>Symptoms</b>                          |                                 |
| Cough                                    | 60% (36/60)                     |
| Fever                                    | 55% (33/60)                     |
| Fatigue                                  | 38.3% (23/60)                   |
| Anosmia                                  | 31.7% (19/60)                   |
| Dyspnea                                  | 26.7% (16/60)                   |
| Diarrhea                                 | 16.7% (10/60)                   |
| Days Post Symptom Onset<br>at Collection | 6 to 90 (median = 35.5)         |

172
